# Supplementary material for: Dose response association of objective physical activity with mental health in a representative national sample of adults: A cross-sectional study
Source: PLOS journal article supplement (doi:10.1371/journal.pone.0204682), 2018-10-24

**S3 Fig. Associations between self-reported mental health and LPA-Sedentary combination**  
(It is the same 3D graphic presented with four different perspectives)

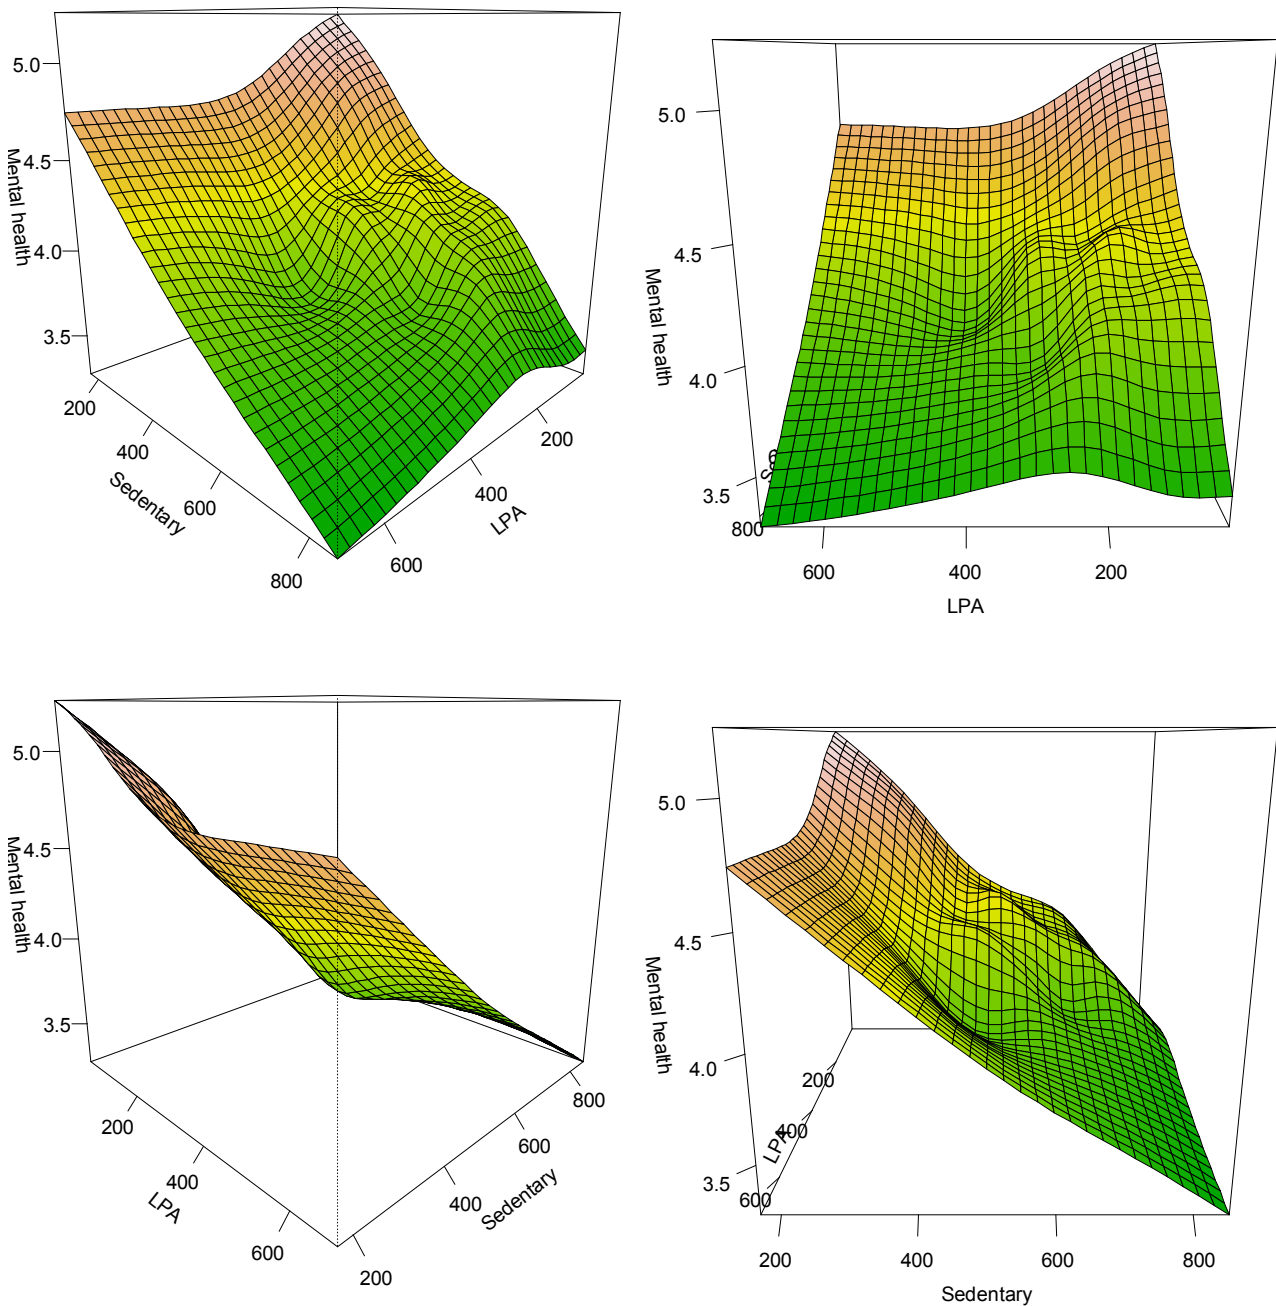

Supplement: S3 (10.1371/journal.pone.0204682.s003) [file journal.pone.0204682.s003]
